# Supplementary material for: Potential Therapeutic Effect of Micrornas in Extracellular Vesicles from Mesenchymal Stem Cells against SARS-CoV-2
Source: MDPI journal article supplement (doi:10.3390/cells10092393), 2021-09-12
Supplement: s1 [file s1]

# Supplementary information

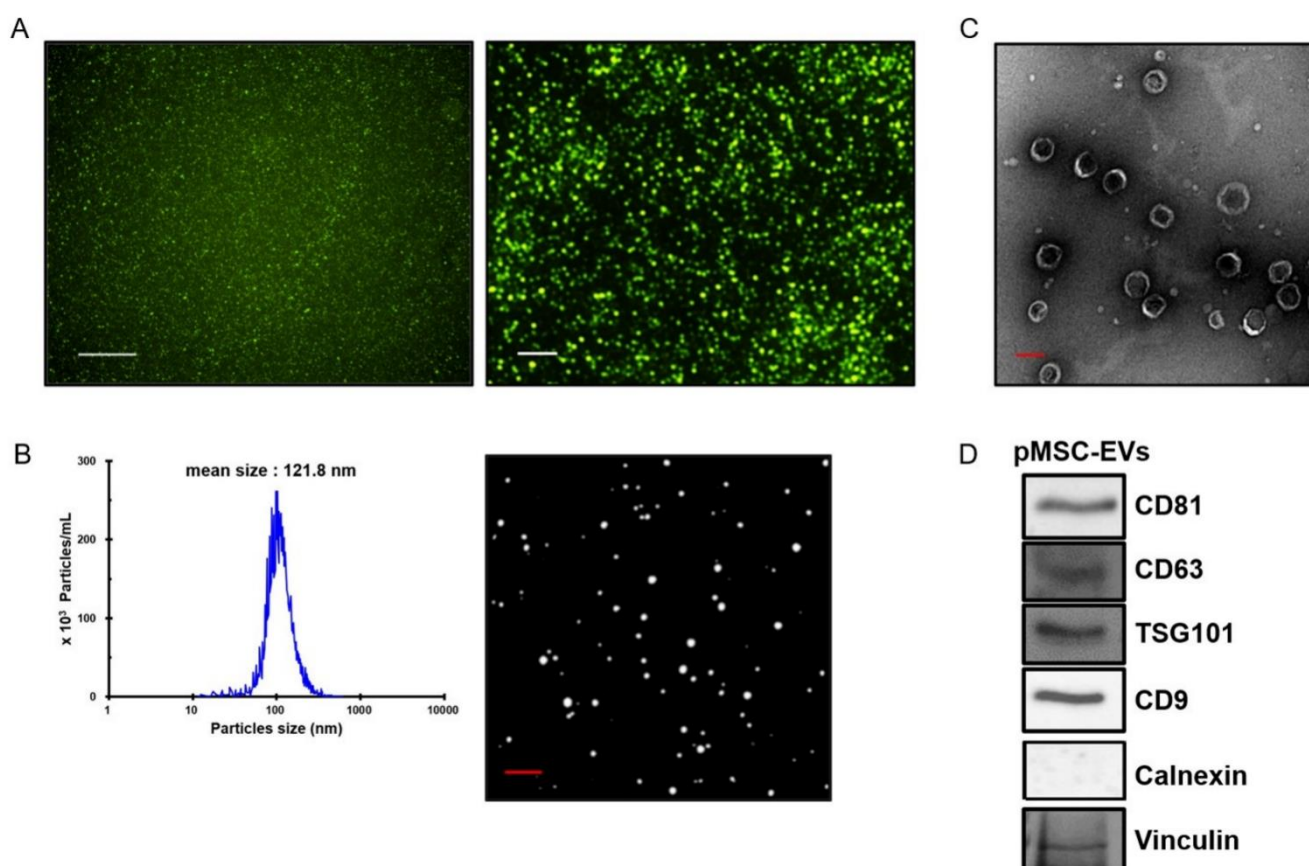

**Figure S1. Characterization of human placenta derived mesenchymal stem cells-EVs.** (A) Fluorescence microscopy images of EVs. EVs were stained for CD63, the common EV marker and Alexa 488 (green). Scale bar: 50  $\mu$ m (left), 4  $\mu$ m (right). (B) The average size of EVs is 121.8 nm in diameter measured by nanoparticle tracking analysis (NTA) and (C) transmission electron microscopy (TEM). Scale bar: 0.1  $\mu$ m. (D) Western blotting detected typical EV markers, including CD81, CD63, TSG101, CD9, and Calnexin, a negative marker.

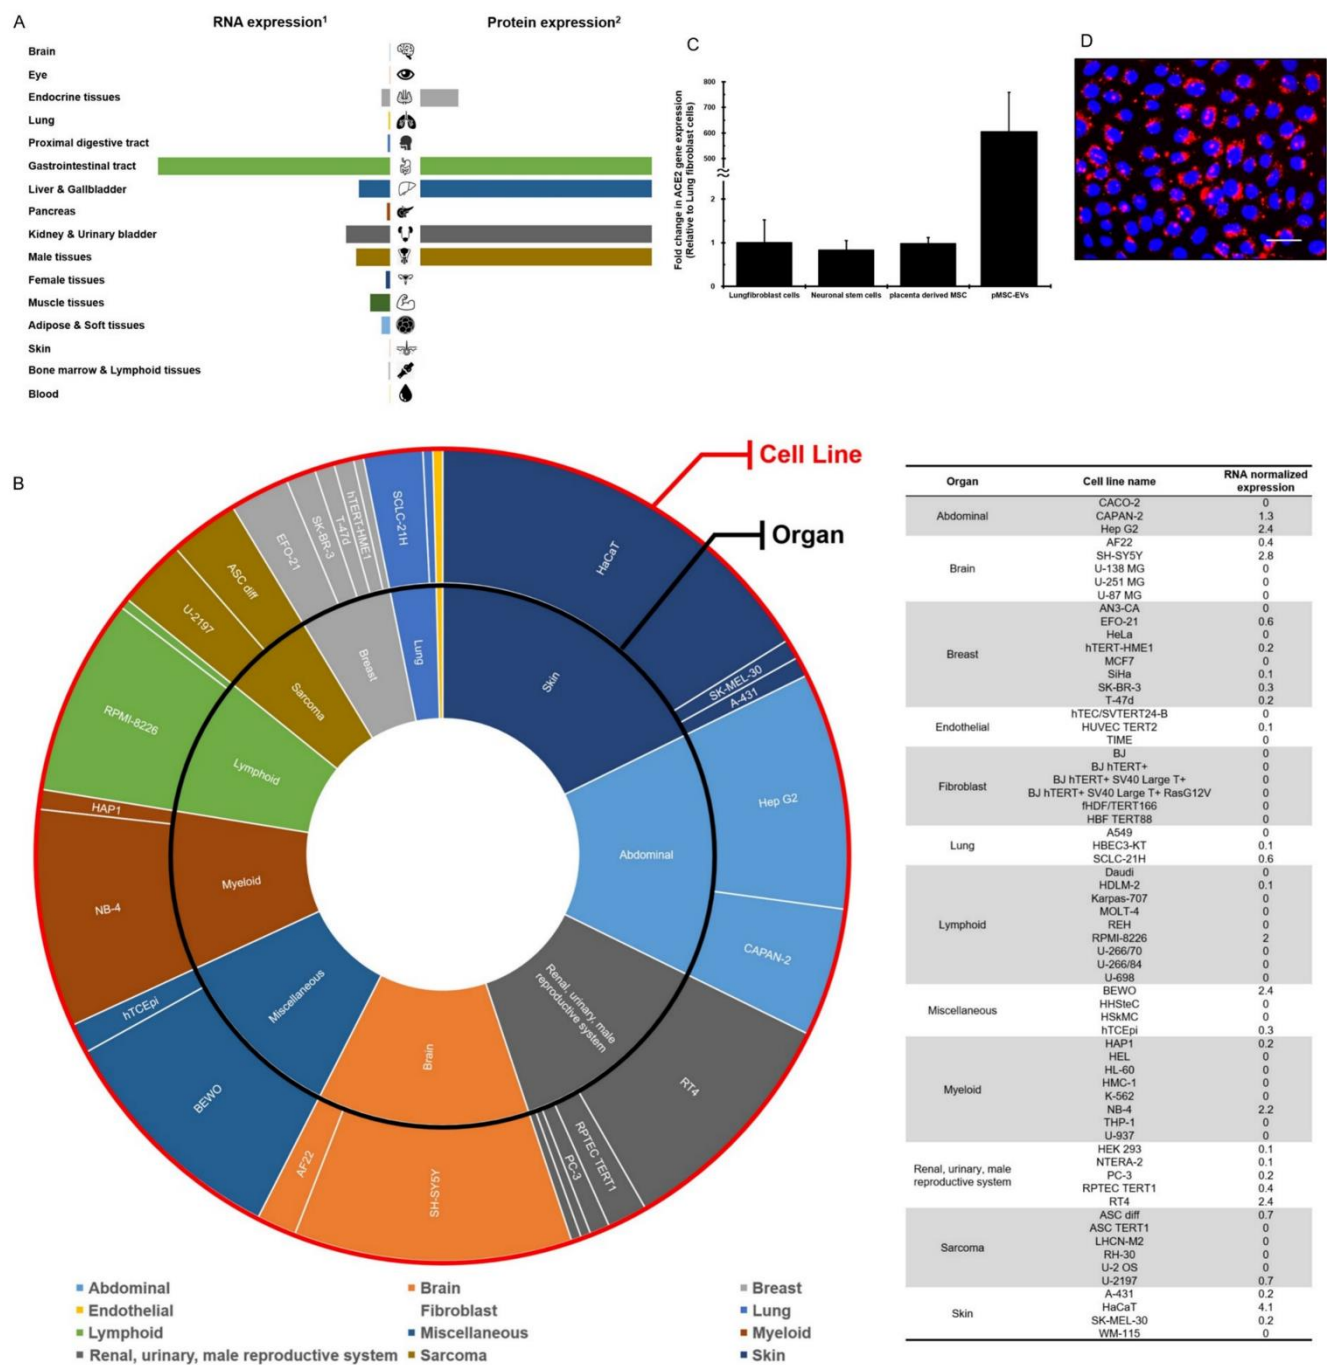

**Figure S2. Organs expressing ACE2 receptors.** (A) Summarization of ACE2 gene expression level of ACE2 receptor in various human tissues. Data were obtained from Human Protein Atlas (HPA). (1 indicates ACE2 RNA expression measured by RNA sequencing; 2 indicates ACE2 protein expression measured by in situ hybridization.) (B) Summarization of ACE2 expression in human cell lines. Expression data were acquired from HPA. (C) Gene expression levels of ACE2 in human lung fibroblasts (LL24), neuronal stem cells (NSCs), pMSCs, and pMSC-EVs. (D) Uptake of EVs of PKH26 labelled EVs by Beas-2B cells observed for 24 h after EV treatment.

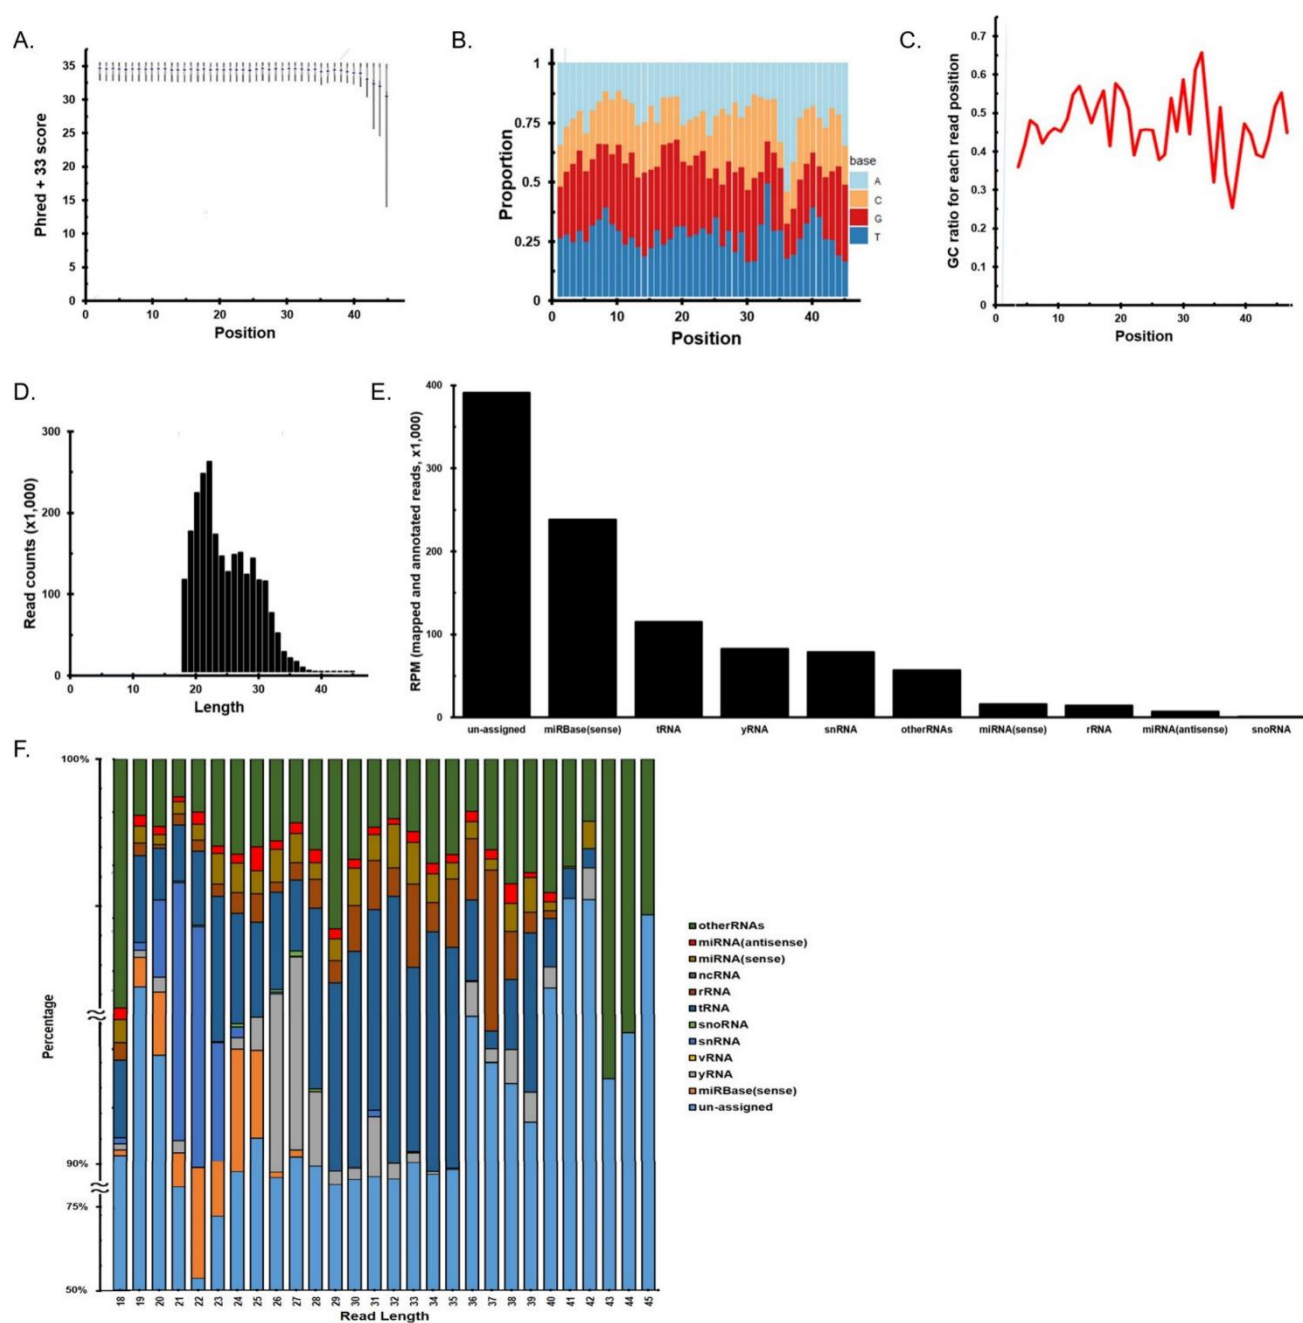

**Figure S3. Quality control information for the small RNA sequencing library.** (A) The Phred + 33 score for each read position. Total number of reads in the library, 24,834,367; average Phred score, 34.8. (B) The ratio of A, T, G, and C for each read position. (C) The GC ratio for each read position. (D) Histogram showing read length distribution. Read length ranged from 18 to 45. Most reads were 18–23 bases in length, corresponding to the size of miRNAs. (E) Table showing small miRNA library reads mapped on to the human genome. Unassigned reads were most common, followed by miRNAs, and tRNAs. (F) Classification of RNA versus read length. Reads of 20–24 bases, the size of most miRNAs, mapped mainly to miRNAs.

A.

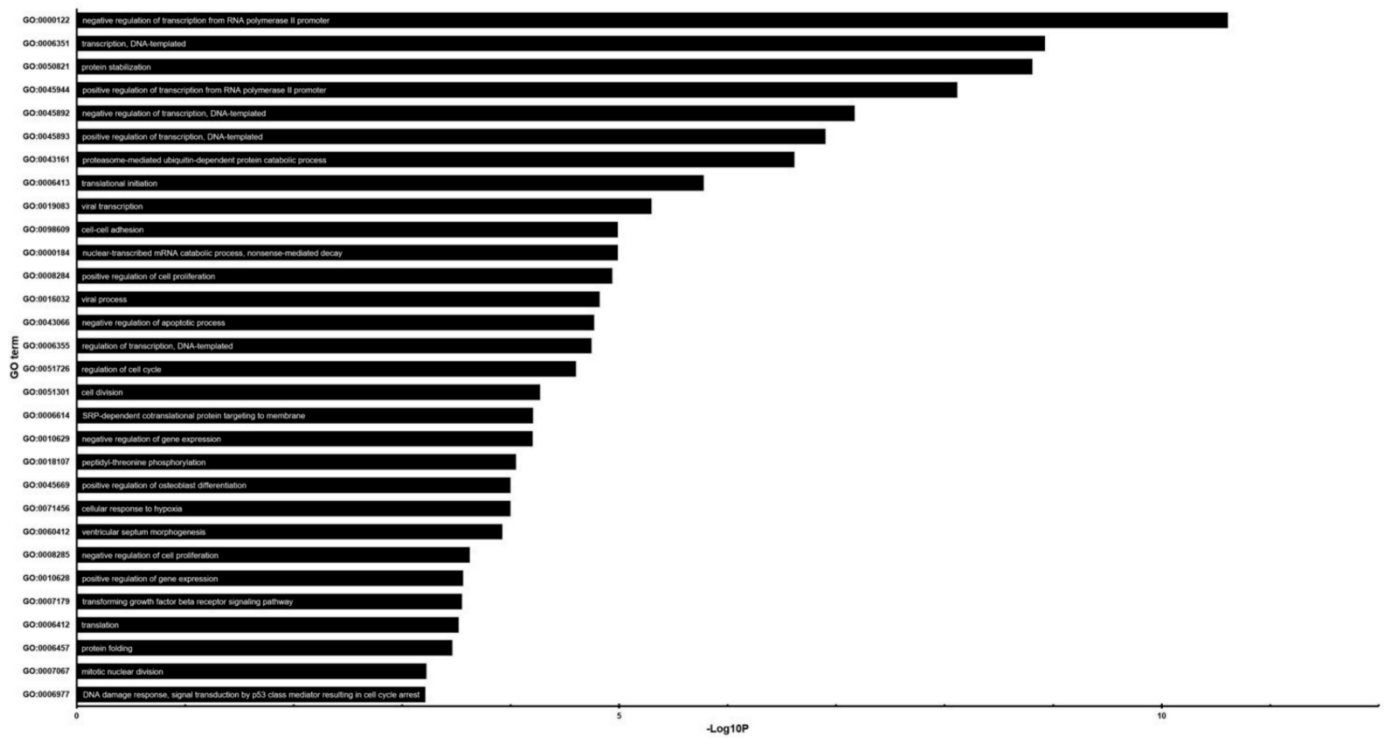

B.

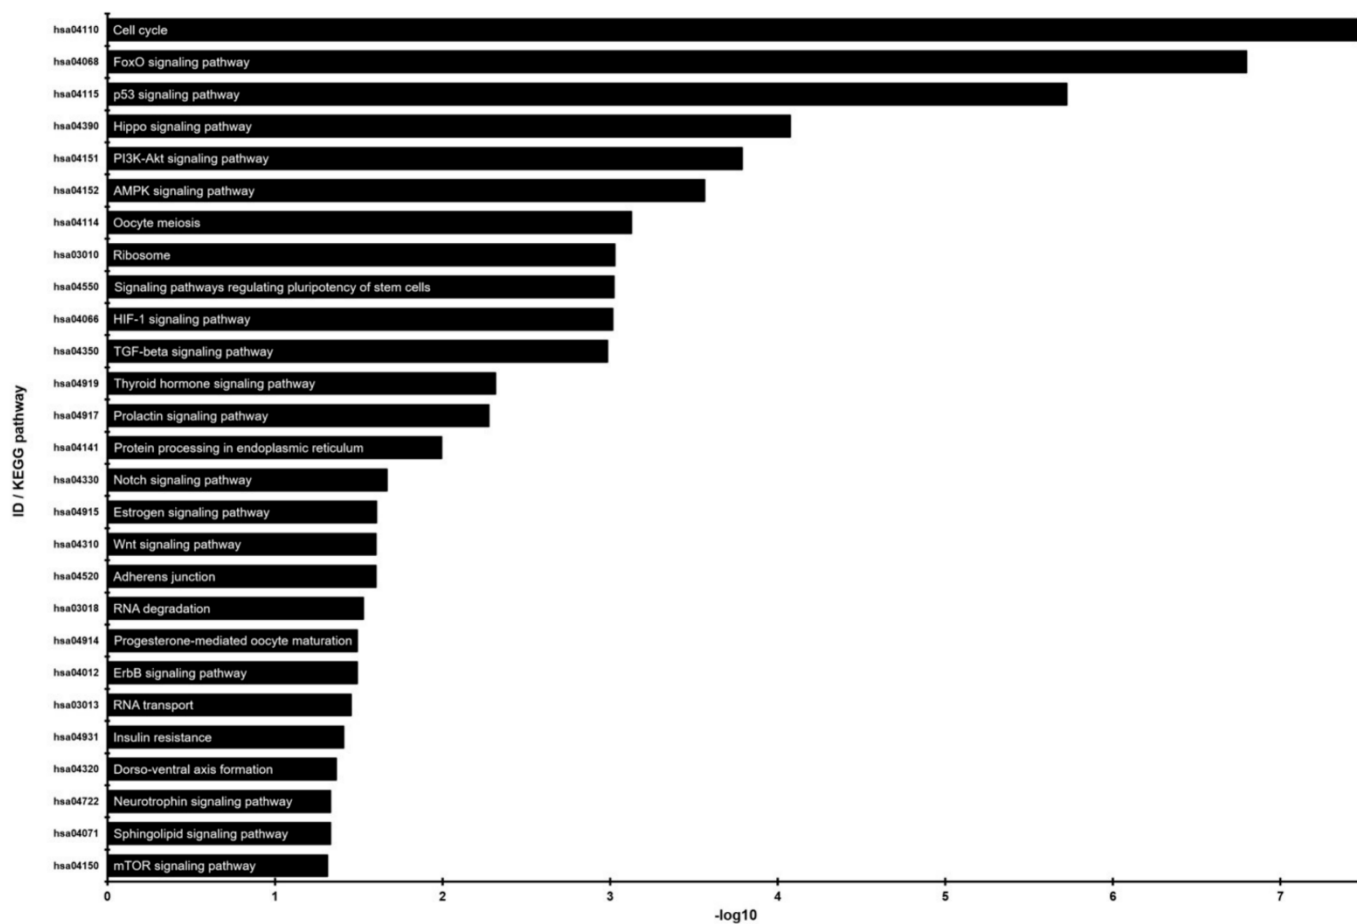

C.

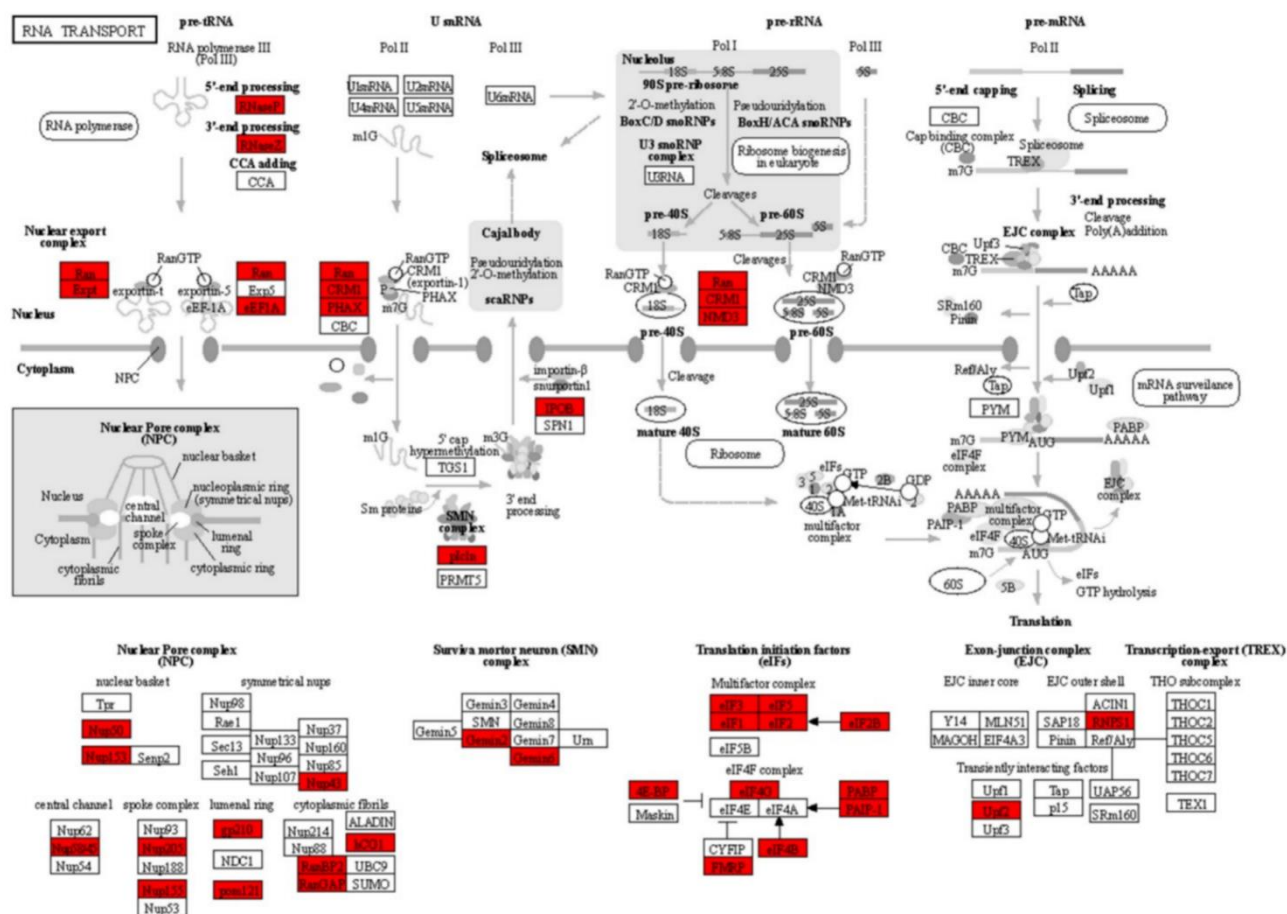



### Eukaryotic RNA degradation

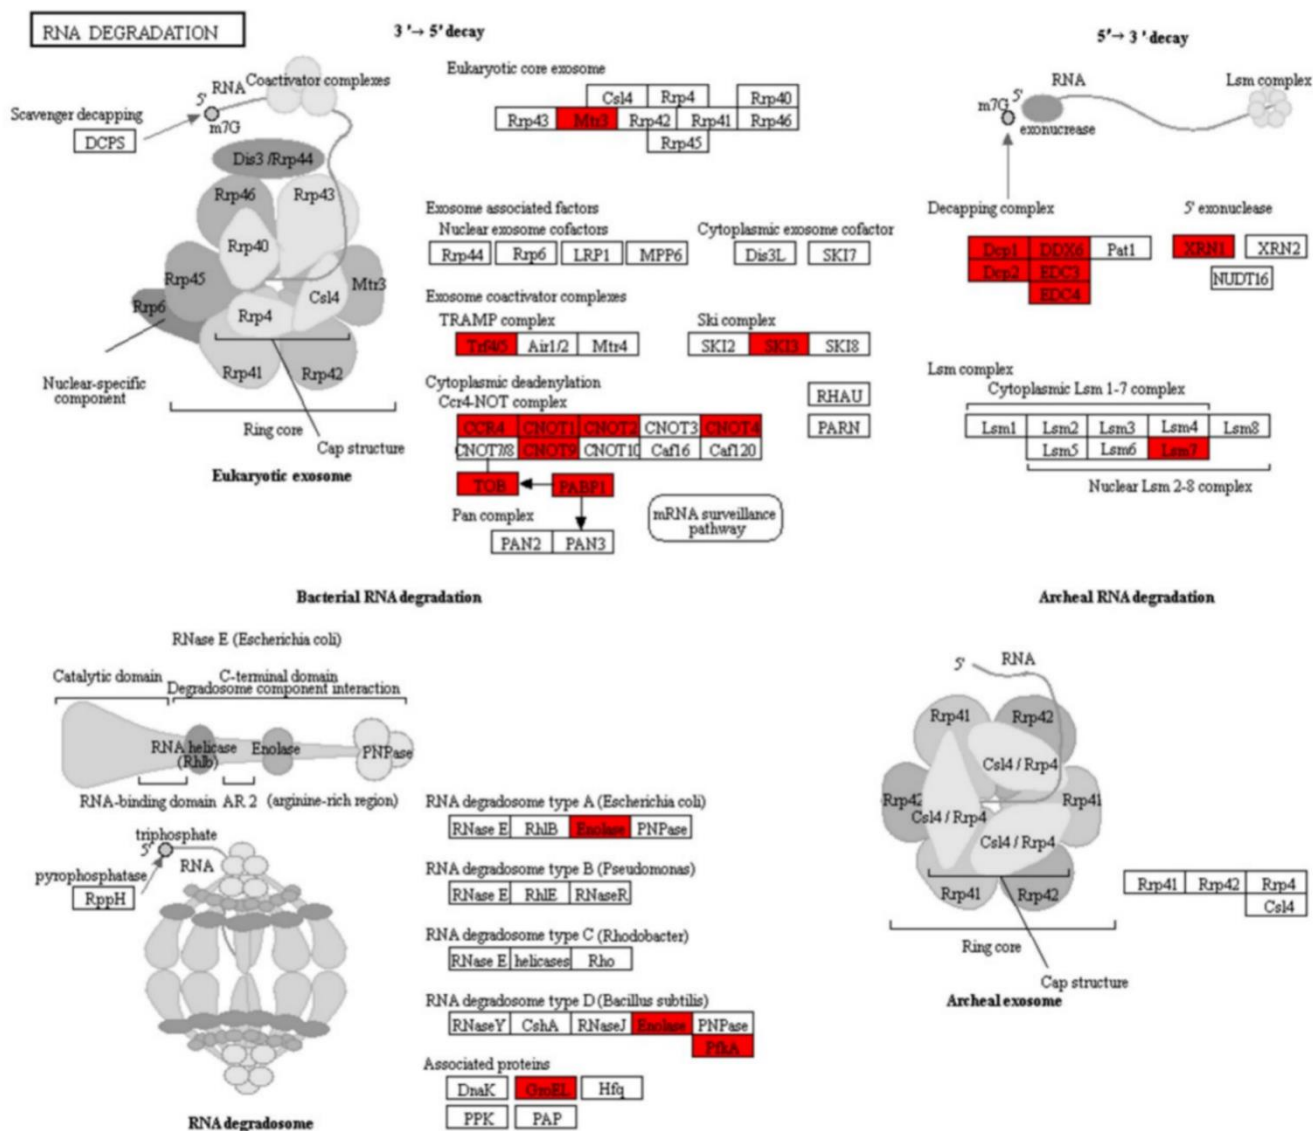

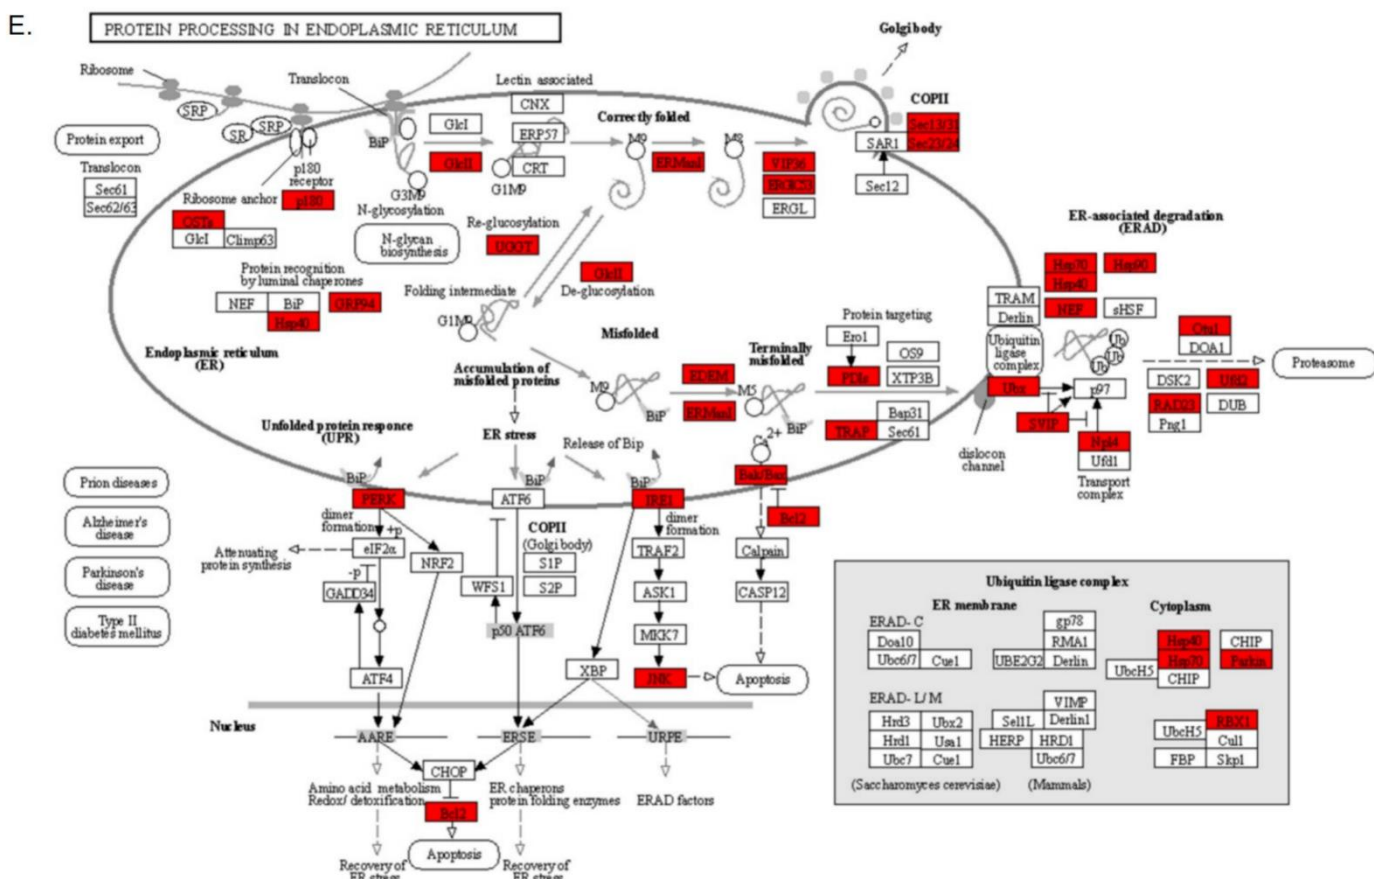



**Figure S4. Function of mRNAs targeted by the five miRNAs.** (A) Statistical enrichment analysis of GO terms for the target genes of the miRNAs. The plot shows the top 30 GO terms. The x axis shows minus log10 transformed adjusted p-values and the y axis shows the GO terms. (B) Statistical enrichment analysis of 83 inflammatory associated genes in KEGG pathways. The pathway showing adjusted p-values < 0.05 is presented in the plot. The x axis shows minus log10 transformed and adjusted p-values, and the y axis shows the names of the KEGG pathway i.e., RNA transport (C), RNA degradation (D), protein processing in endoplasmic reticulum (E), and TGF-BETA signaling pathway (F). The red box in each pathway indicates the gene targeted directly by miRNAs.

A.

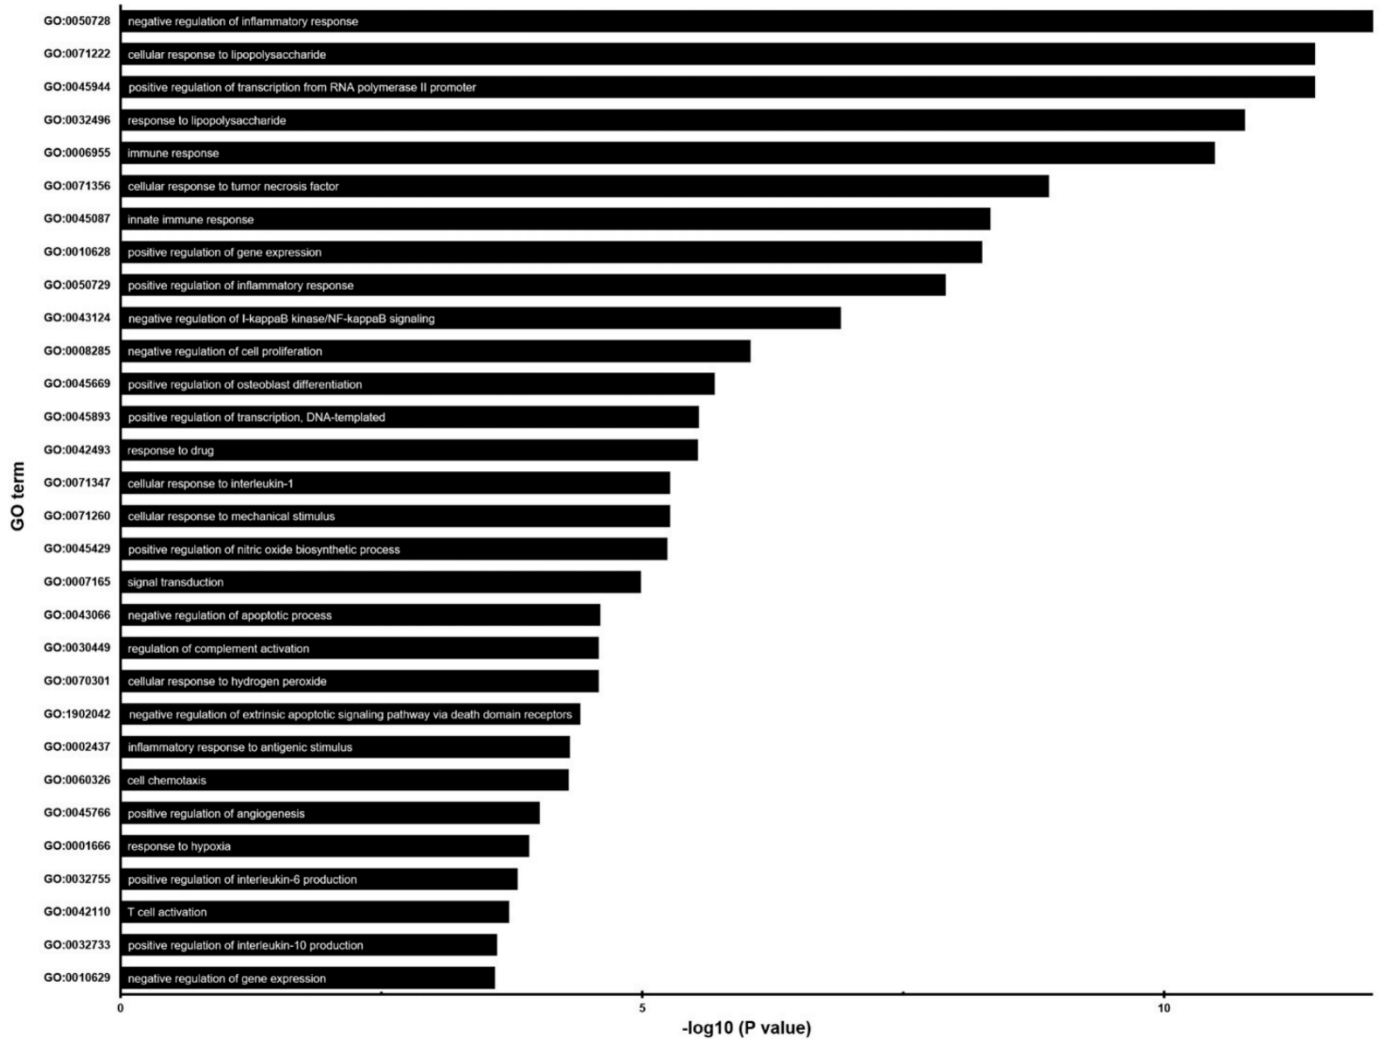

B.

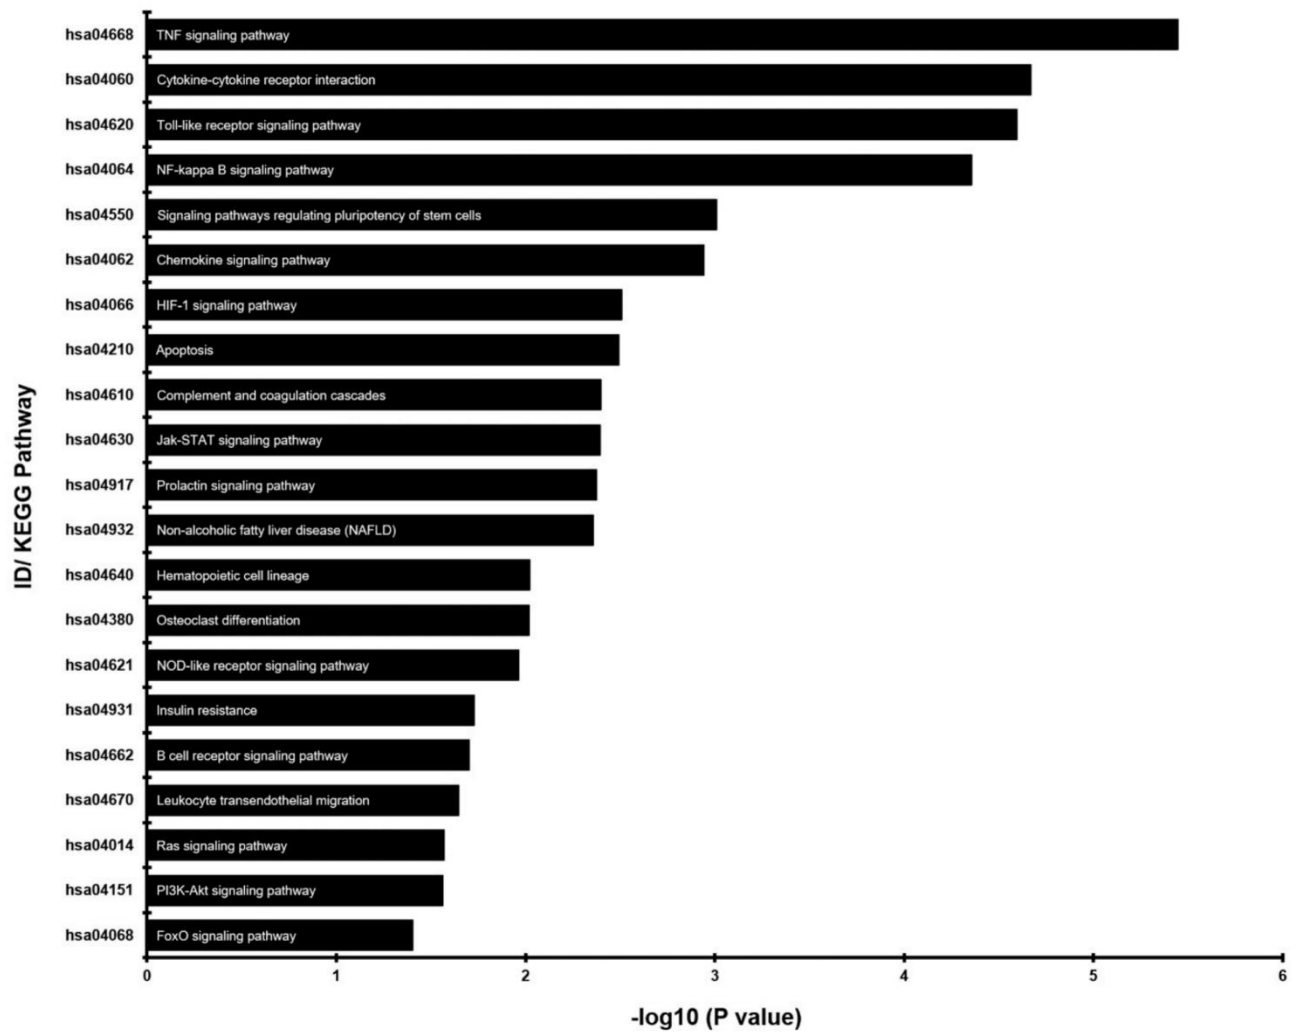

## C. TNF SIGNALING PATHWAY

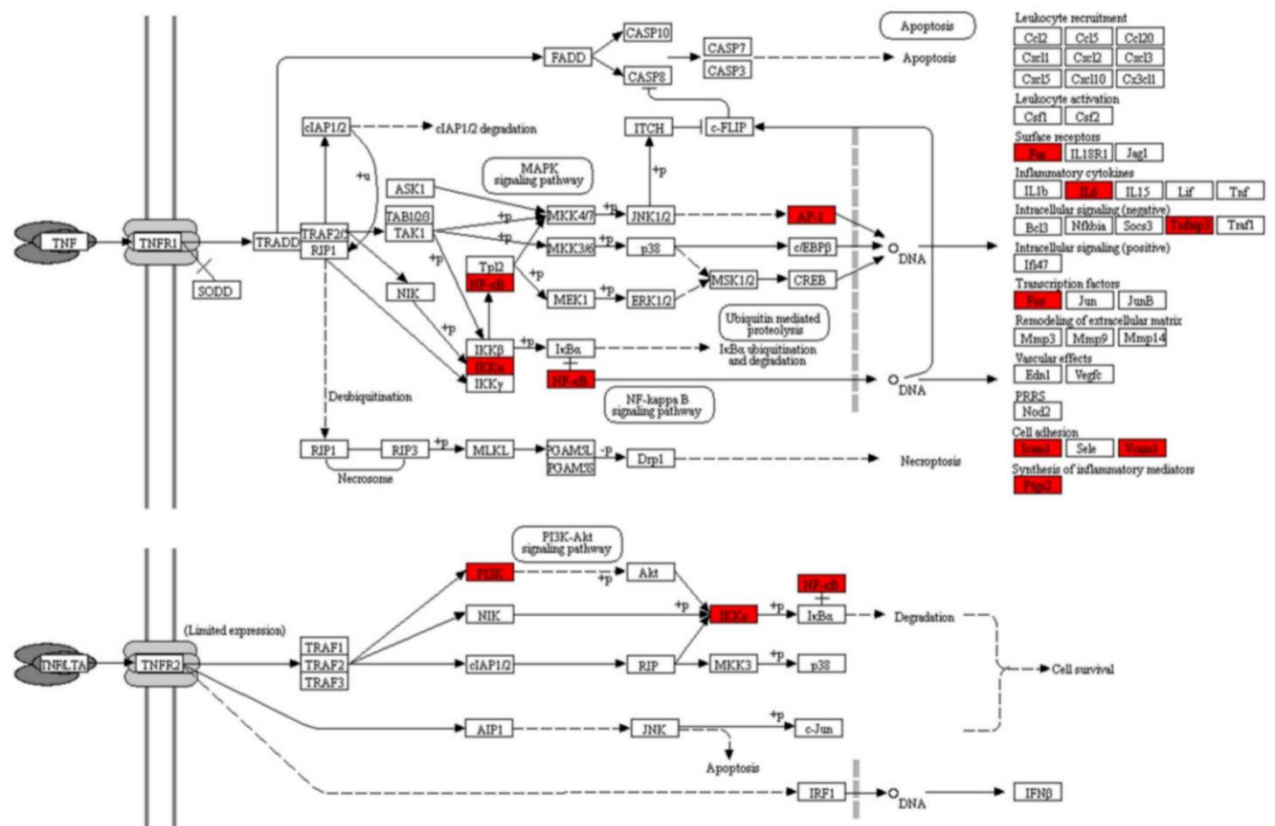

## D. CYTOKINE-CYTOKINE RECEPTOR INTERACTION

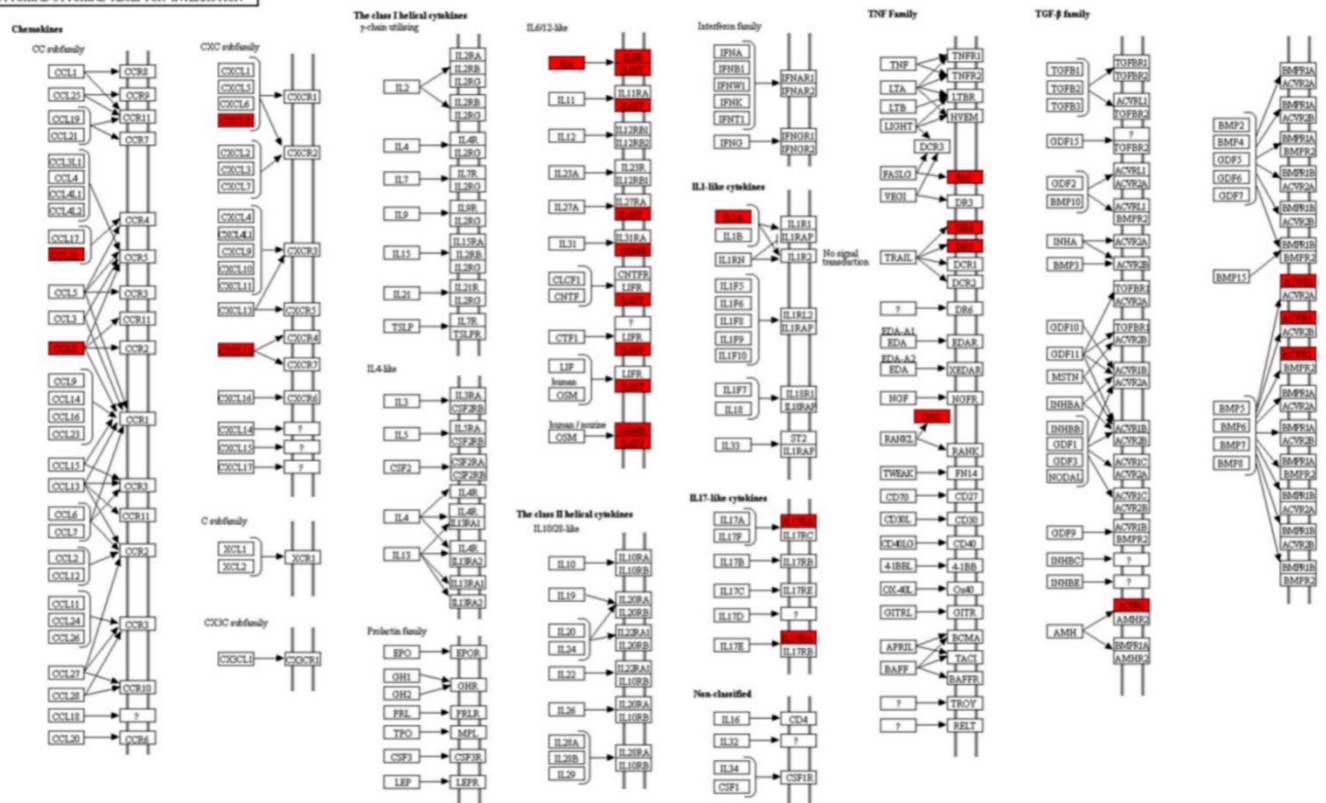

TOLL-LIKE RECEPTOR SIGNALING PATHWAY

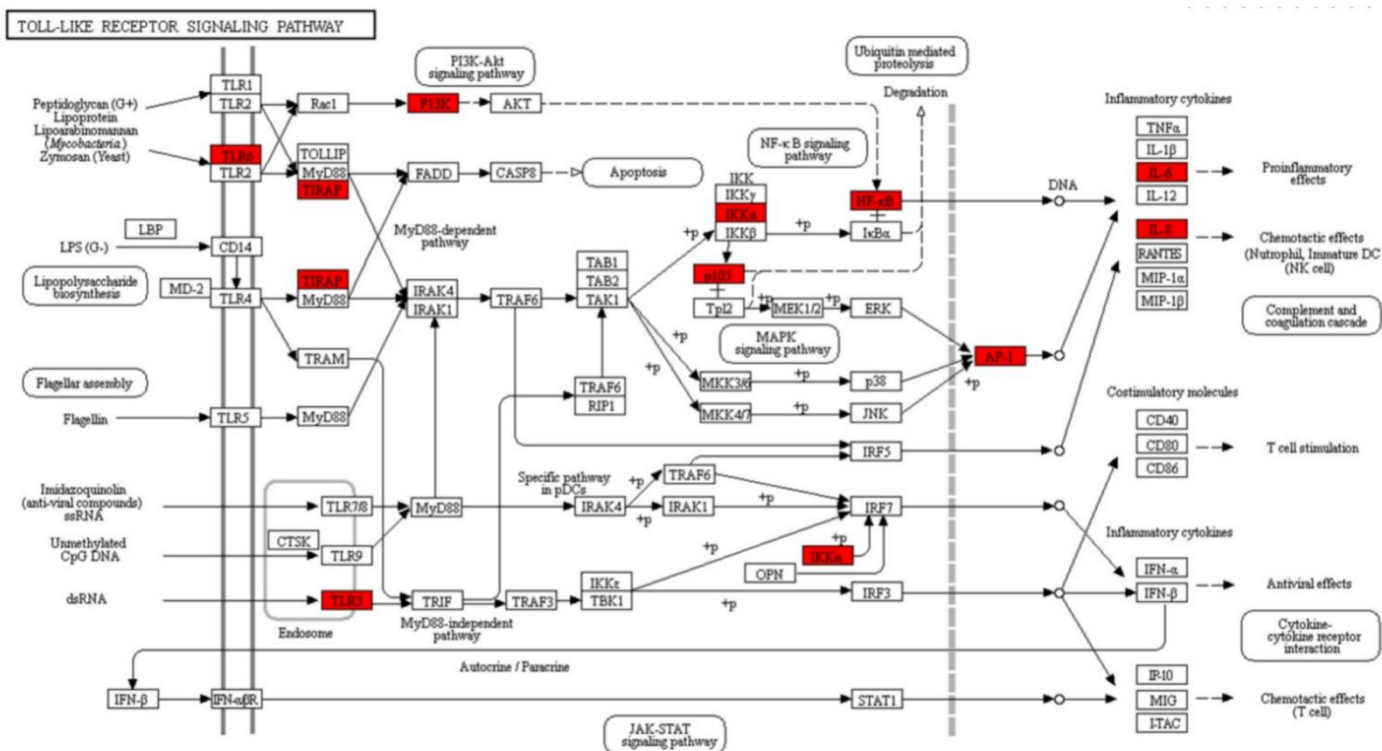

F. **NF-KAPPA B SIGNALING PATHWAY**

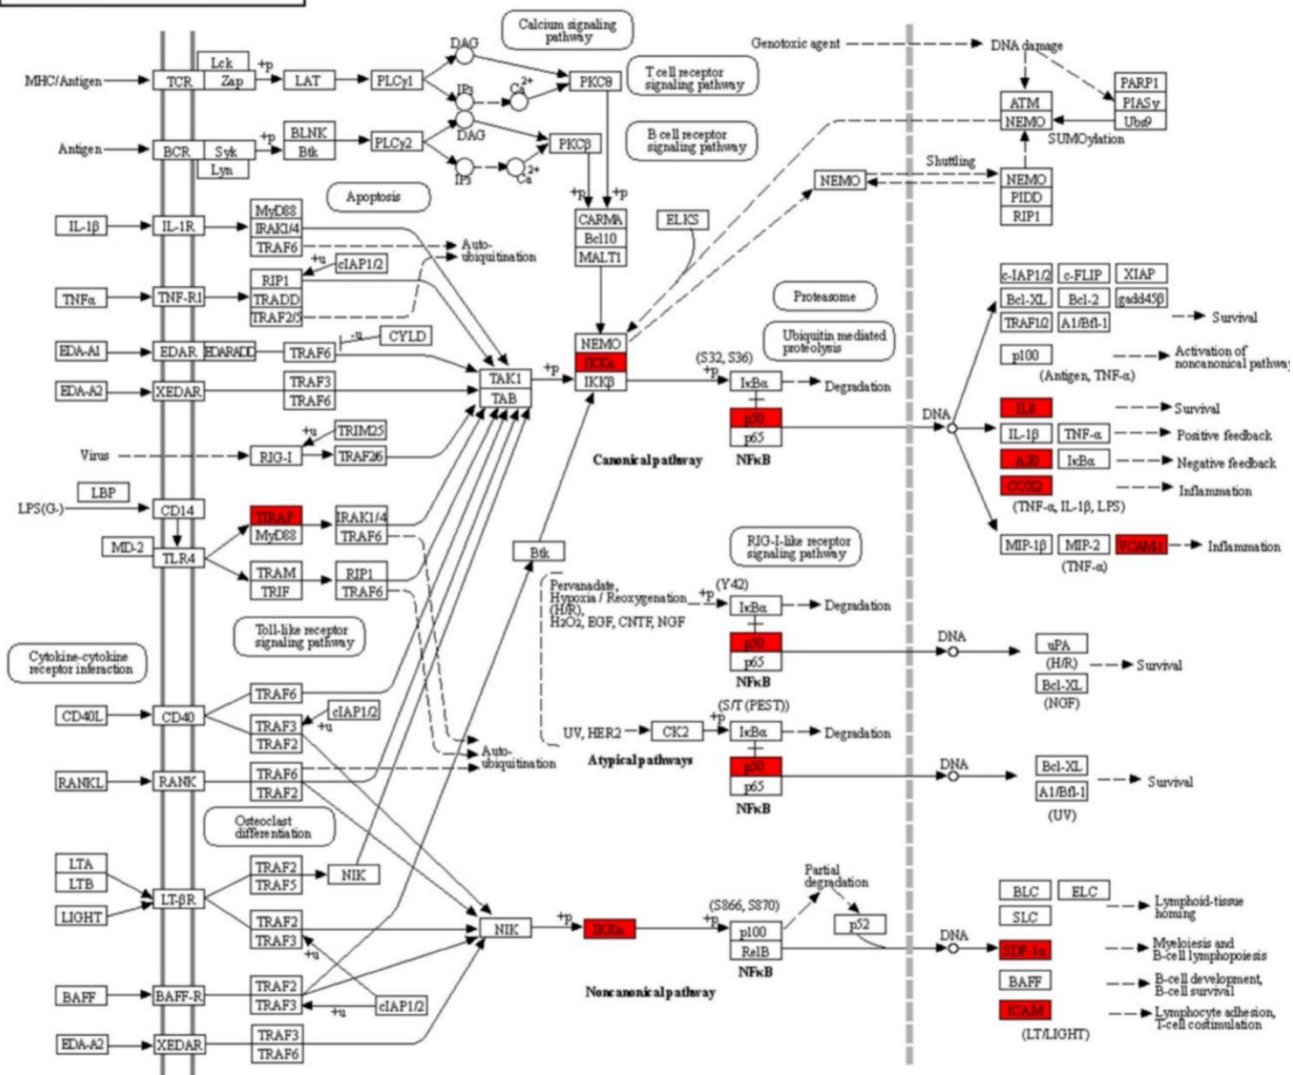



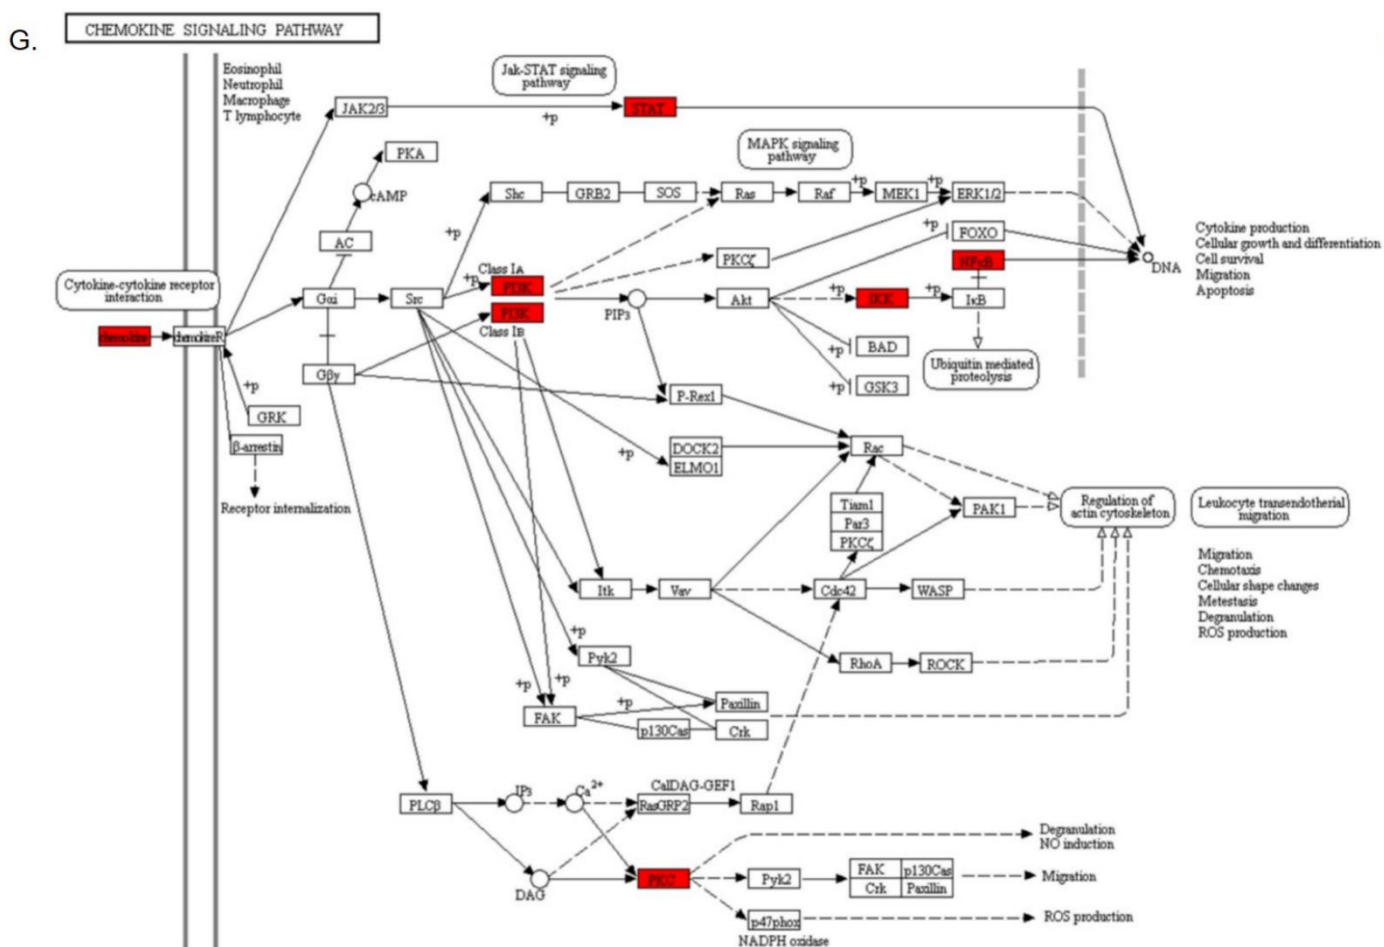

**Figure S5. Significant inflammatory KEGG pathways regulating by the targets of the five miRNAs.** (A) Statistical enrichment analysis of GO terms for 83 inflammatory associated genes. The plot shows the top 30 GO terms. The X axis shows minus log<sub>10</sub> transformed and adjusted p-values and the y axis shows the GO terms. (B) Significant pathways involving the 83 genes targeted by the five miRNAs. The 83 genes are predicted to be involved in inflammatory responses through pathways such as TNF signaling (C), Toll-like receptor signaling (D), cytokine-cytokine interactions (E), NF-kAPPAB signaling (F), and chemokine signaling (G). The red box in each pathway indicates the gene targeted directly by the miRNAs.

**Table S1.** The expression levels of 84 common miRNAs present in EVs derived from eight MSCs cultured under various conditions and six PD-EVs.

| miRNA           | ID            | MSC1-EVs | MSC2-EVs | MSC3-EVs | MSC4-EVs | MSC5-EVs | MSC6-EVs | MSC7-EVs | MSC8-EVs | PD1-EVs  | PD2-EVs | PD3-EVs  | PD4-EVs  | PD5-EVs  | PD6-EVs  |
|-----------------|---------------|----------|----------|----------|----------|----------|----------|----------|----------|----------|---------|----------|----------|----------|----------|
| hsa-let-7a-5p   | MIMAT0000062  | 94794.5  | 174629.0 | 46080.8  | 143994.2 | 150493.2 | 149839.8 | 85700.1  | 143439.6 | 144317.8 | 61717.9 | 162406.0 | 183726.9 | 107008.0 | 44679.7  |
| hsa-let-7b-5p   | MIMAT0000063  | 24148.8  | 27689.1  | 27639.8  | 36074.7  | 40177.1  | 42825.4  | 30255.1  | 41274.1  | 6056.7   | 22314.1 | 67574.5  | 66459.6  | 60121.6  | 126851.1 |
| hsa-let-7c-5p   | MIMAT0000064  | 12691.4  | 15227.9  | 7272.3   | 2232.5   | 1315.5   | 1350.5   | 1631.8   | 1597.7   | 292.5    | 5093.9  | 4038.8   | 4228.7   | 22756.9  | 2550.9   |
| hsa-let-7d-3p   | MIMAT0004484  | 2471.4   | 2467.9   | 2261.5   | 1311.6   | 3020.3   | 4473.8   | 5158.8   | 4006.1   | 101.5    | 475.9   | 4799.9   | 3327.8   | 998.0    | 464.7    |
| hsa-let-7d-5p   | MIMAT0000065  | 6419.2   | 5729.5   | 4334.5   | 6996.3   | 7653.0   | 8463.9   | 5703.0   | 8485.1   | 7587.0   | 7381.3  | 9765.3   | 17322.6  | 14850.8  | 4868.8   |
| hsa-let-7e-5p   | MIMAT0000066  | 1135.1   | 12220.7  | 940.4    | 6093.1   | 4536.5   | 2901.6   | 27.4     | 2320.5   | 203.8    | 87.5    | 783.8    | 12.4     | 207.4    | 175.0    |
| hsa-let-7f-5p   | MIMAT0000067  | 28077.8  | 31777.1  | 8165.9   | 17125.9  | 29276.5  | 19973.1  | 9935.5   | 19680.1  | 105722.7 | 31636.4 | 7414.8   | 10400.3  | 33481.6  | 51633.5  |
| hsa-let-7g-5p   | MIMAT0000414  | 8550.7   | 6416.1   | 5405.9   | 6606.7   | 8709.1   | 8111.8   | 7245.7   | 8316.0   | 121519.6 | 25982.6 | 22060.0  | 23165.7  | 22722.5  | 21268.4  |
| hsa-let-7f-5p   | MIMAT0000415  | 8767.2   | 13644.8  | 8980.2   | 21659.4  | 18630.5  | 15206.3  | 11782.9  | 15445.5  | 25622.5  | 12732.9 | 42426.7  | 30302.2  | 10657.1  | 10663.7  |
| hsa-miR-1-3p    | MIMAT0000416  | 288.2    | 153.7    | 678.5    | 319.9    | 61.9     | 968.3    | 1539.6   | 218.1    | 74.5     | 346.4   | 7.6      | 1894.7   | 138.6    | 348.8    |
| hsa-miR-100-5p  | MIMAT0000098  | 1695.1   | 20479.4  | 6424.4   | 5349.3   | 13293.7  | 9368.7   | 5170.4   | 3067.4   | 192.2    | 2849.6  | 531.9    | 1576.6   | 11035.3  | 1276.0   |
| hsa-miR-103a-3p | MIMAT0000101  | 2316.2   | 789.5    | 1370.3   | 3897.2   | 1116.2   | 3332.8   | 3476.3   | 2741.9   | 2594.7   | 1123.3  | 9689.5   | 4620.3   | 963.6    | 1507.8   |
| hsa-miR-10a-5p  | MIMAT0000253  | 3666.6   | 27949.7  | 6109.7   | 3047.1   | 9902.0   | 13208.4  | 7132.7   | 2501.0   | 198.0    | 173.8   | 1130.6   | 828.6    | 3163.6   | 522.7    |
| hsa-miR-122-5p  | MIMAT0000421  | 45289.8  | 516.1    | 55547.5  | 319.9    | 6919.5   | 6690.0   | 4346.4   | 4788.4   | 124.6    | 2633.8  | 3602.2   | 2717.5   | 19938.2  | 3478.1   |
| hsa-miR-1249-3p | MIMAT0005901  | 504.6    | 147.4    | 226.9    | 461.6    | 480.1    | 1205.7   | 242.1    | 505.9    | 39.7     | 130.6   | 2169.1   | 2154.2   | 35.5     | 117.0    |
| hsa-miR-125a-5p | MIMAT0000443  | 2565.5   | 5061.9   | 2266.3   | 5012.8   | 2991.7   | 2434.7   | 2421.2   | 3323.2   | 323.4    | 303.3   | 1605.3   | 1689.0   | 619.9    | 812.4    |
| hsa-miR-125b-5p | MIMAT0000423  | 1408.0   | 6206.3   | 4464.3   | 4127.4   | 3153.4   | 3309.4   | 3372.6   | 14521.7  | 182.5    | 1209.6  | 1548.8   | 1634.8   | 3713.6   | 580.6    |
| hsa-miR-126-3p  | MIMAT0000445  | 21598.6  | 6784.8   | 9588.0   | 6211.0   | 7023.1   | 3131.1   | 2828.5   | 3064.0   | 37417.1  | 24601.5 | 5921.0   | 1312.5   | 26022.4  | 18486.8  |
| hsa-miR-127-3p  | MIMAT0000446  | 7350.9   | 20358.6  | 8350.9   | 82260.1  | 49057.5  | 25435.2  | 17224.4  | 30016.3  | 2847.5   | 57617.8 | 1205.7   | 5.2      | 11344.6  | 2782.7   |
| hsa-miR-1307-3p | MIMAT0005951  | 697.5    | 471.6    | 1118.1   | 1966.9   | 967.0    | 1149.9   | 1202.2   | 1055.2   | 487.4    | 260.1   | 2090.7   | 4295.6   | 860.5    | 175.0    |
| hsa-miR-139-5p  | MIMAT0000250  | 1968.0   | 605.1    | 1048.5   | 178.2    | 1024.2   | 1263.6   | 1169.4   | 1609.1   | 1402.1   | 5352.8  | 2183.8   | 1688.6   | 25094.3  | 4810.9   |
| hsa-miR-143-3p  | MIMAT0000435  | 8767.2   | 6638.6   | 5756.6   | 1205.4   | 1094.8   | 948.3    | 1254.4   | 657.8    | 582.0    | 303.3   | 2629.4   | 2070.9   | 8010.3   | 232.9    |
| hsa-miR-146a-5p | MIMAT0000449  | 3657.2   | 4642.3   | 2254.3   | 7757.7   | 6247.6   | 5165.7   | 2908.8   | 4931.2   | 29598.3  | 7251.8  | 2091.5   | 2200.1   | 4401.0   | 6085.8   |
| hsa-miR-149-5p  | MIMAT0000450  | 749.3    | 1794.0   | 1653.8   | 2887.7   | 1982.9   | 1738.3   | 1551.1   | 2198.3   | 120.8    | 1036.9  | 2609.6   | 2981.8   | 6291.6   | 1334.0   |
| hsa-miR-150-5p  | MIMAT0000451  | 15764.0  | 2137.3   | 4882.2   | 2144.0   | 5126.2   | 11390.0  | 7149.6   | 8240.7   | 64757.9  | 27191.0 | 19599.2  | 18110.1  | 9969.7   | 19240.2  |
| hsa-miR-151a-5p | MIMAT0004697  | 1742.1   | 3764.9   | 849.1    | 1347.0   | 1031.3   | 827.9    | 1212.6   | 347.2    | 6137.8   | 5180.2  | 1323.5   | 4.0      | 4022.9   | 3420.1   |
| hsa-miR-155-5p  | MIMAT0000646  | 565.8    | 1997.5   | 798.6    | 2108.5   | 1289.6   | 1424.1   | 324.5    | 961.6    | 4516.8   | 1598.0  | 1065.2   | 2594.3   | 757.4    | 36045.3  |
| hsa-miR-15a-5p  | MIMAT0000068  | 255.2    | 121.9    | 472.0    | 54.3     | 332.6    | 121.5    | 135.1    | 270.7    | 825.1    | 303.3   | 351.1    | 1290.7   | 138.6    | 348.8    |
| hsa-miR-15b-5p  | MIMAT0000417  | 1233.9   | 541.6    | 1202.2   | 1010.6   | 797.2    | 2024.6   | 1101.3   | 1142.0   | 4954.8   | 1641.2  | 1821.6   | 1604.1   | 860.5    | 1276.0   |
| hsa-miR-16-5p   | MIMAT0000069  | 16262.7  | 6072.8   | 9131.6   | 4676.4   | 8425.9   | 7943.6   | 5346.5   | 19177.6  | 27641.0  | 23997.3 | 13269.7  | 21690.8  | 13304.0  | 9562.7   |
| hsa-miR-181a-5p | MIMAT0000256  | 38622.4  | 37384.6  | 46899.9  | 47674.2  | 34659.8  | 59005.5  | 48244.7  | 46861.9  | 54427.9  | 52740.9 | 181180.1 | 151561.2 | 47575.0  | 35581.7  |
| hsa-miR-181b-5p | MIMAT0000257  | 5021.7   | 6009.2   | 5992.0   | 10874.6  | 5509.5   | 7197.0   | 7362.1   | 6471.7   | 5335.0   | 4230.7  | 19837.8  | 18473.0  | 12513.3  | 2666.8   |
| hsa-miR-185-5p  | MIMAT0000455  | 890.4    | 83.8     | 560.8    | 89.7     | 247.7    | 1112.1   | 606.2    | 2126.4   | 796.2    | 432.7   | 1223.3   | 1576.8   | 413.6    | 232.9    |
| hsa-miR-191-5p  | MIMAT0000440  | 7854.3   | 4979.2   | 8999.4   | 7137.9   | 5204.9   | 8330.2   | 7966.4   | 8069.4   | 19065.2  | 12603.4 | 18059.0  | 24612.9  | 14507.1  | 8519.6   |
| hsa-miR-193a-5p | MIMAT0004614  | 95.3     | 312.7    | 452.7    | 2391.9   | 1490.6   | 558.3    | 656.6    | 430.5    | 35.9     | 44.3    | 986.1    | 3699.4   | 35.5     | 59.1     |
| hsa-miR-196b-5p | MIMAT0001080  | 330.5    | 662.3    | 447.9    | 426.2    | 354.1    | 236.3    | 677.8    | 174.7    | 377.4    | 260.1   | 586.9    | 894.9    | 207.4    | 175.0    |
| hsa-miR-197-3p  | MIMAT0000227  | 706.9    | 579.7    | 1161.4   | 390.7    | 2565.5   | 869.2    | 1844.3   | 5083.0   | 475.9    | 648.5   | 6307.7   | 6515.3   | 551.1    | 522.7    |
| hsa-miR-199a-3p | MIMAT0000232  | 20154.0  | 21414.0  | 8197.1   | 7970.3   | 17506.5  | 16835.3  | 5591.0   | 11069.4  | 10462.3  | 6345.5  | 11332.8  | 15199.8  | 3301.1   | 44505.8  |
| hsa-miR-199b-3p | MIMAT00004563 | 10079.9  | 10701.2  | 4101.5   | 3985.7   | 8753.8   | 8418.2   | 2796.1   | 5535.3   | 5242.4   | 3194.9  | 5665.9   | 7600.5   | 1651.1   | 22253.5  |
| hsa-miR-204-5p  | MIMAT0000265  | 979.9    | 2328.1   | 443.1    | 249.1    | 480.1    | 327.6    | 648.3    | 125.6    | 53.2     | 475.9   | 29.5     | 2284.0   | 7494.7   | 24861.2  |
| hsa-miR-21-5p   | MIMAT0000076  | 36683.8  | 87400.9  | 15146.4  | 23324.1  | 16188.6  | 7478.9   | 6596.4   | 10455.0  | 64767.5  | 41044.9 | 11959.5  | 11079.1  | 21381.9  | 77420.8  |
| hsa-miR-22-3p   | MIMAT0000077  | 1117.4   | 6803.9   | 5634.1   | 2037.7   | 2467.2   | 3484.3   | 1946.5   | 2900.7   | 3696.6   | 23695.2 | 5624.6   | 4788.7   | 20591.3  | 333091.0 |
| hsa-miR-221-3p  | MIMAT0000278  | 14174.4  | 2181.8   | 863.5    | 11795.4  | 1471.8   | 756.6    | 745.2    | 342.6    | 2035.1   | 1598.0  | 2757.3   | 16123.3  | 13417.7  | 986.3    |
| hsa-miR-222-3p  | MIMAT0000279  | 6480.4   | 14147.1  | 5773.4   | 67419.8  | 26264.5  | 4853.7   | 11204.6  | 8859.6   | 1627.9   | 993.8   | 978.9    | 3166.3   | 5672.9   | 1102.2   |
| hsa-miR-223-3p  | MIMAT0000280  | 3930.1   | 605.1    | 1151.8   | 443.9    | 2502.9   | 1292.6   | 1355.9   | 1924.3   | 26253.5  | 11783.4 | 3377.9   | 4427.8   | 5776.0   | 7013.0   |
| hsa-miR-23a-3p  | MIMAT0000078  | 6706.2   | 12951.8  | 4783.7   | 8289.0   | 7572.6   | 8400.4   | 5572.6   | 6467.1   | 22322.6  | 10531.8 | 11721.2  | 9163.4   | 7735.3   | 8635.5   |
| hsa-miR-23b-3p  | MIMAT0000418  | 1144.5   | 1088.3   | 640.1    | 72.0     | 237.9    | 431.2    | 256.5    | 19.4     | 2259.0   | 648.5   | 674.9    | 664.4    | 688.6    | 1102.2   |
| hsa-miR-24-3p   | MIMAT0000080  | 16709.7  | 18057.1  | 25213.7  | 19251.0  | 16459.3  | 20199.3  | 14589.4  | 15524.3  | 24858.3  | 17523.5 | 45282.8  | 53489.2  | 17532.0  | 12286.3  |
| hsa-miR-25-3p   | MIMAT0000081  | 1012.8   | 732.3    | 1317.5   | 1701.2   | 1637.1   | 609.5    | 905.4    | 1352.1   | 2982.6   | 950.6   | 2785.4   | 2615.2   | 3816.7   | 638.6    |
| hsa-miR-26a-5p  | MIMAT0000082  | 40749.2  | 39953.1  | 14889.4  | 13708.0  | 14638.0  | 10542.0  | 13273.9  | 11473.7  | 112982.4 | 77945.5 | 28227.5  | 26250.9  | 35578.4  | 50648.4  |
| hsa-miR-26b-5p  | MIMAT0000083  | 2932.6   | 2582.4   | 753.0    | 1293.9   | 1775.6   | 1823.0   | 685.7    | 733.2    | 23453.4  | 8546.5  | 1967.5   | 521.9    | 2613.6   | 3883.7   |
| hsa-miR-27a-3p  | MIMAT0000084  | 5172.3   | 2728.6   | 2741.9   | 1701.2   | 2083.9   | 2636.4   | 3046.0   | 1674.2   | 13573.1  | 7036.0  | 5823.6   | 6933.1   | 2648.0   | 5158.6   |
| hsa-miR-27b-3p  | MIMAT0000419  | 2495.0   | 1183.7   | 995.6    | 213.7    | 949.1    | 962.7    | 998.0    | 1190.0   | 3021.2   | 2935.9  | 1305.2   | 3133.6   | 1823.0   | 1334.0   |
| hsa-miR-29a-3p  | MIMAT0000086  | 725.8    | 910.3    | 584.9    | 691.8    | 125.3    | 692.0    | 507.1    | 331.2    | 3304.9   | 907.5   | 563.9    | 255.7    | 448.0    | 812.4    |
| hsa-miR-30d-5p  | MIMAT0000245  | 2297.3   | 2391.7   | 2064.6   | 868.9    | 1520.1   | 2240.8   | 2100.3   | 3278.7   | 7878.4   | 3669.6  | 4158.8   | 909.3    | 3301.1   | 3362.2   |
| hsa-miR-320a-3p | MIMAT0000510  | 5106.4   | 5061.9   | 7125.8   | 28743.1  | 11980.2  | 7795.4   | 8351.0   | 10351.1  | 2056.3   | 35175.4 | 14461.6  | 19816.5  | 1857.4   | 45433.0  |
| hsa-miR-320c    | MIMAT00005793 | 245.8    | 274.5    | 584.9    | 1293.9   | 297.8    | 414.5    | 1020.3   | 475.1    | 57.1     | 44.3    | 27.4     | 1192.9   | 241.8    | 348.8    |
| hsa-miR-328-3p  | MIMAT0000752  | 1229.2   | 630.6    | 1310.3   | 1081.4   | 1281.5   | 1659.2   | 1572.7   | 1534.8   | 113.1    | 1080.1  | 4023.7   | 2477.8   | 1101.1   | 1160.1   |
| hsa-miR-342-3p  | MIMAT0000753  | 2029.1   | 795.9    | 558.4    | 922.0    | 675.7    | 583.9    | 741.9    | 561.9    | 10618.6  | 4662.3  | 1017.7   | 2870.8   | 5260.4   | 2435.0   |
| hsa-miR-345-5p  | MIMAT0000772  | 307.0    | 312.7    | 1161.4   | 638.7    | 222.7    | 1161.1   | 2080.9   | 862.2    | 255.9    | 173.8   | 5287.1   | 745.6    | 104.3    | 290.9    |
| hsa-miR-34a-5p  | MIMAT0000255  | 6936.8   | 18336.8  | 7572.6   | 11476.7  | 12203.6  | 11298.6  | 2931.5   | 5980.6   | 446.9    | 5050.7  | 1017.4   | 2124.7   | 14678.9  | 10779.6  |
| hsa-miR-369-5p  | MIMAT0001621  | 1116.3   | 3625.1   | 2167.8   | 1506.4   | 2730.8   | 3746.2   | 2147.1   | 2216.6   | 400.6    | 821.2   | 4.7      | 632.4    | 1169.9   | 348.8    |
| hsa-miR-378a-3p | MIMAT0000732  | 3986.5   | 3542.4   | 5192.1   | 2374.2   | 3916.4   | 8655.6   | 4833.6   | 4402.4   | 1423.4   | 9323.4  | 20153.7  | 15699.4  | 688.6    | 232.9    |
| hsa-miR-411-5p  | MIMAT0003329  | 862.2    | 2226.4   | 798.6    | 1453.3   | 1269.0   | 539.3    | 267.6    | 402.0    | 298.3    | 216.9   | 90       |          |          |          |

**Table S2.** miRNAs matched to the coding region binding sites of SARS-CoV-2.

| miRNA           | Expression (%) <sup>1</sup> | Score <sup>2</sup> |
|-----------------|-----------------------------|--------------------|
| hsa-miR-181a-5p | 4.69                        | 70                 |
| hsa-miR-26a-5p  | 1.58                        | 68                 |
| hsa-miR-199a-3p | 1.31                        | 69                 |
| hsa-miR-320a-3p | 1.15                        | 73                 |
| hsa-miR-16-5p   | 0.78                        | 99                 |
| hsa-miR-23a-3p  | 0.74                        | 79                 |
| hsa-miR-181b-5p | 0.73                        | 70                 |
| hsa-miR-199b-3p | 0.65                        | 69                 |
| hsa-miR-122-5p  | 0.64                        | 67                 |
| hsa-miR-378a-3p | 0.49                        | 55                 |
| hsa-miR-27a-3p  | 0.29                        | 67                 |
| hsa-miR-103a-3p | 0.26                        | 85                 |
| hsa-miR-197-3p  | 0.25                        | 82                 |
| hsa-miR-30d-5p  | 0.20                        | 95                 |
| hsa-miR-26b-5p  | 0.14                        | 68                 |
| hsa-miR-139-5p  | 0.12                        | 83                 |
| hsa-miR-27b-3p  | 0.11                        | 67                 |
| hsa-miR-15b-5p  | 0.11                        | 99                 |
| hsa-miR-532-5p  | 0.10                        | 61                 |
| hsa-miR-155-5p  | 0.09                        | 51                 |
| hsa-miR-1-3p    | 0.09                        | 54                 |
| hsa-miR-411-5p  | 0.09                        | 88                 |
| hsa-miR-320c    | 0.07                        | 73                 |
| hsa-miR-424-5p  | 0.07                        | 98                 |
| hsa-miR-196b-5p | 0.06                        | 52                 |
| hsa-miR-29a-3p  | 0.04                        | 91                 |
| hsa-miR-23b-3p  | 0.03                        | 79                 |

1 indicates “Percentage of miRNAs in EVs”.

2 indicates the prediction score or the miRDB method. According to miRDB, a predicted target with score > 80 is most likely to be real.
